# Supplementary material
Source: PubMed Central journal article supplement (PMC7141896)
Supplement: 10-1055-s-0039-1697063_00029_s1.pdf [file 10-1055-s-0039-1697063_00029_s1.pdf]

**Appendix A** Descriptives of postoperative subluxated PIP joint cases

|                           | Patient 1 | Patient 2            | Patient 3                | Patient 4 | Patient 5               | Patient 6 |
|---------------------------|-----------|----------------------|--------------------------|-----------|-------------------------|-----------|
| Sex                       | Man       | Woman                | Man                      | Man       | Man                     | Woman     |
| Age (years)               | 21        | 23                   | 25                       | 35        | 39                      | 69        |
| Race                      | Black     | White                | White                    | White     | White                   | White     |
| Finger                    | Index     | Little               | Middle                   | Middle    | Ring                    | Little    |
| Cause of injury           | Sports    | Fall                 | Unknown                  | Unknown   | Crush                   | Fall      |
| Comminution               | Yes       | Yes                  | Yes                      | Yes       | No                      | Yes       |
| Articular involvement (%) | 54        | 71                   | 53                       | 45        | 34                      | 59        |
| Fracture displacement (%) | 79        | 47                   | 44                       | 19        | 88                      | 58        |
| Days to treatment         | 32        | 13                   | 6                        | 20        | 7                       | 26        |
| Initial treatment         | ORIF      | Percutaneous pinning | Volar plate arthroplasty | ORIF      | Extension block pinning | ORIF      |
| Immobilization (d)        | 23        | 26                   | 20                       | 14        | 29                      | 35        |
| Reoperation               | No        | No                   | No                       | Yes       | No                      | Yes       |

Abbreviations: ORIF, open reduction and internal fixation; PIP, proximal interphalangeal.

**Appendix B** Factors associated with postoperative arthritis

| Characteristics                            | Postoperative arthritis |            | p-Value |
|--------------------------------------------|-------------------------|------------|---------|
|                                            | No                      | Yes        |         |
|                                            | (n = 33)                | (n = 12)   |         |
| Age, median (IQR), years                   | 39 (27–45)              | 43 (22–56) | 0.67    |
| Sex, n (%)                                 |                         |            |         |
| Men                                        | 21 (64)                 | 9 (82)     | 0.46    |
| Women                                      | 12 (36)                 | 2 (18)     |         |
| Race, n (%)                                |                         |            |         |
| White                                      | 25 (76)                 | 8 (73)     | >0.99   |
| Other                                      | 8 (24)                  | 3 (27)     |         |
| Smoking, n (%) <sup>a</sup>                |                         |            |         |
| Yes                                        | 4 (14)                  | 1 (11)     | >0.99   |
| No                                         | 25 (86)                 | 8 (89)     |         |
| Diabetes, n (%) <sup>a</sup>               |                         |            |         |
| Yes                                        | 1 (8.3)                 | 0          | >0.99   |
| No                                         | 11 (92)                 | 8 (100)    |         |
| BMI, median (IQR) <sup>a</sup>             | 26 (23–28)              | 23 (22–27) | 0.50    |
| Dominant side affected, n (%) <sup>a</sup> |                         |            |         |
| Yes                                        | 16 (52)                 | 7 (78)     | 0.26    |
| No                                         | 15 (48)                 | 2 (22)     |         |
| Affected finger, n (%)                     |                         |            |         |
| Index                                      | 3 (9.1)                 | 1 (9.1)    | 0.17    |
| Middle                                     | 10 (30)                 | 1 (9.1)    |         |
| Ring                                       | 9 (27)                  | 7 (64)     |         |
| Little                                     | 11 (33)                 | 2 (18)     |         |

(continued)

## Appendix B (continued)

|                                                   |              |              |       |
|---------------------------------------------------|--------------|--------------|-------|
| Cause of injury, <i>n</i> (%) <sup>a</sup>        |              |              |       |
| Impact                                            | 24 (86)      | 9 (82)       | 0.78  |
| Crush                                             | 3 (11)       | 1 (9.1)      |       |
| Sharp                                             | 1 (3.6)      | 1 (9.1)      |       |
| Open fracture, <i>n</i> (%)                       |              |              |       |
| Yes                                               | 4 (12)       | 2 (18)       | 0.63  |
| No                                                | 29 (88)      | 9 (82)       |       |
| Days between injury and first visit, median (IQR) | 6.0 (3.0–11) | 5.0 (1.0–19) | 0.32  |
| Days between injury and treatment, median (IQR)   | 11 (6.0–19)  | 9.5 (5.0–32) | 0.65  |
| Articular involvement, mean (SD), %               | 42 (21)      | 43 (14)      | 0.88  |
| Fragment displacement, median (IQR), %            | 57 (35–79)   | 63 (41–79)   | 0.76  |
| Comminution, <i>n</i> (%)                         |              |              |       |
| Yes                                               | 14 (42)      | 6 (55)       | 0.51  |
| No                                                | 19 (58)      | 4 (45)       |       |
| Treatment, <i>n</i> (%)                           |              |              |       |
| Open reduction and internal fixation              | 24 (73)      | 4 (36)       | 0.091 |
| Percutaneous pinning                              | 5 (15)       | 4 (36)       |       |
| Hemihamate                                        | 2 (6.1)      | 2 (18)       |       |
| Static external fixation                          | 1 (3.0)      | 0            |       |
| Volar plate arthroplasty                          | 1 (3.0)      | 0            |       |
| Extension block pinning                           | 0            | 1 (9.1)      |       |
| Preoperative subluxation, <i>n</i> (%)            |              |              |       |
| Yes                                               | 5 (15)       | 10 (91)      | >0.99 |
| No                                                | 28 (85)      | 1 (9.1)      |       |

Abbreviations: BMI, body mass index; IQR, interquartile range; SD, standard deviation.

<sup>a</sup>Incomplete data.
